# Supplementary material
Source: Research Square preprint supplement (doi:10.21203/rs.3.rs-9486129/v1)
Supplement: Supplementary file 1 [file aa17088156e55bef58609fbb.docx]

**Annex I: Semi-structured Questionnaire**

**Consent form**

Informed Consent Form

Study Title: Assessment of Processing and Consumption Practices of Finger Millet- Based Food Products: A FCross-sectional study in Northwest Ethiopia

Introduction

You are kindly invited to participate in a research study that aims to assess the processing methods and consumption practices of finger millet based foods and to identify factors influencing their utilization in Northwest Ethiopia. Before you decide to participate, please read the following information carefully.

Purpose of the Study

The purpose of this study is to collect information on socio-demographic characteristics, consumption patterns, perceptions, awareness, and processing practices related to finger millet-based foods.

Procedures

If you agree to participate, you will be asked to answer a questionnaire that includes questions about your background, dietary practices, awareness, and opinions regarding finger millet-based foods. The interview will take approximately ----------minutes.

Voluntary Participation

Your participation in this study is completely voluntary. You may choose not to participate or withdraw at any time without any penalty or loss of benefits.

Risks and Benefits

There are no known risks associated with participation in this study. Although there is no direct financial benefit, your responses will contribute to improving understanding of finger millet utilization and may support future nutrition and food security programs.

Confidentiality

All information collected will be kept strictly confidential and used only for research purposes. Your name or any personal identifiers will not be included in any report or publication.

Contact Information

If you have any questions about the study, you may contact:

Researcher: Anmut Mulualem

Contact: ______________________

Consent Statement

I have read (or have been read) the above information. I understand the purpose of the study and voluntarily agree to participate.

Participant Signature: ____________________

Date: ____________________

Interviewer Signature: ____________________

**Part I: Socio-Demographic characteristics of the respondents**

1. Age of the Respondent

1) 18-25 2) 26-35 3) 36-45 4) 46-55 5) 56-65

6) Above 65

1. Gender of the Respondent

1) Male 2) Female

1. Location of the Respondent

1) Merawi district 2) Fagita-Lekoma district 3) Dangila district 4 Achefer district

1. Educational Background of the Respondent
2. No education
3. Can read and write
4. Grade 1–4
5. Grade 5–8
6. Grade 9–10
7. Grade 11–12
8. Diploma and higher
9. / Some collegeIncome Level of the Respondent

1) <25,000 2)25,000-50,000 3)50,000-75,000

4)75,000-100,000 5)>100,000

1. Occupation of the Respondent
2. Homemaker/housewife 2) Professional 3) Business 4) Employee 5) Student 6) Farmer 7) labour

**Part II: Perception, Consumption, Awareness, and availability of the Respondents on Finger Millet and Its Based Foods**

1. Are you familiar with finger millet?

1) Yes 2) No

1. What is your perception of finger millet as a food?

1) Healthy 2) Unhealthy 3) Neutral 4) Don’t know

1. Do you consume finger millet?

1) Yes 2) No

1. In what forms do you consume finger millet?

1) Porridge/Genfo 2) Atimit 3) Bread 4) Injera 5) Beverage 6) Kita

1. Are you aware of the nutritional benefits of finger millet?

1) Yes 2) No

1. Which nutrients and minerals do associate with finger millet?

1) Calcium 2) Iron 3) Potassium 4) Phosphorus 5) Don’t know

**Part III: Finger Millet’s Product drying Behaviour after Processing**

1. Does the product of finger millet-based foods feel dry after processing**?**

1) Yes 2) No

1. Are the products of finger millet based product cause stomach constipation or digestive discomfort after consumption? 1)Yes 2) No
2. If yes, what factor do you believe cause constipation?

1) Its high mineral content 2) Its anti-nutritional content 3) Its difficulty for digestibility

1. Why do majority of urban populations’ nott consume finger millet based food product as mainstream cereal crop based food products?

1)Its color 2)its prices 3)Backward urbanized tradition 4)Lack of availability 5)Its health consequence 6)Lack awareness for its nutritional benefits

1. Do you think finger millet is readily available in your area or locality?

1) Yes 2) No 3) Somewhat

Part **IV: Five point Likert-Scale questions to measure perceived Health Benefits of Finger Millet Consumption**

1. What are reasons that enforced you to consume finger millet-based food

|  | 1=Strongly  Disagree | 2=Disagree | 3=Neutral | 4=Agree | 5= strongly Agree |
| --- | --- | --- | --- | --- | --- |
| For weight loss |  |  |  |  |  |
| To maintain blood sugar level |  |  |  |  |  |
| To boost immunity |  |  |  |  |  |
| To avoid cardiovascular risks |  |  |  |  |  |
| For gluten free consumption |  |  |  |  |  |
| Enhancing digestion |  |  |  |  |  |
| For blood pressure |  |  |  |  |  |
| Alternate for maize, wheat and teff |  |  |  |  |  |
| To enrich haemoglobin |  |  |  |  |  |
| For nutritional Benefit |  |  |  |  |  |
| To maintain overall health |  |  |  |  |  |

Barriers Preventing Consumption of Finger Millet-Based Foods

1. What Factors or barriers prevent you from consuming finger millet-based food( put ‘’x’’)

|  | 1= Strongly Disagree | 2= Disagree | 3=Neutral | 4=Agree | 5=Strongly Agree |
| --- | --- | --- | --- | --- | --- |
| Lack of aware on finger millet consumption |  |  |  |  |  |
| Expensiveness |  |  |  |  |  |
| Lack of accessibility |  |  |  |  |  |
| Do not like the taste of it |  |  |  |  |  |
| Don’t know about its processing recipes |  |  |  |  |  |
| It is a considered as rural food |  |  |  |  |  |
| Its color |  |  |  |  |  |
| Cultural/family tradition |  |  |  |  |  |
| Affordability |  |  |  |  |  |
| Availability |  |  |  |  |  |

1. What new finger millet-based products would you be interested in trying?

1) Ready-to-eat meals 2) Baked goods 3) Beverages 4) Instant mixes

**Part V: Frequency of Consumption of Finger Millet-Based Food**

1. How often do you consume finger millet based Injera, atimit, bread, beverage, Porridge/*Genfo*, and kita?( put ‘’x’’ in the space provided)

|  | 1=Daily | 2=Weekly | 3=Monthly | 4=Less than monthly | 5=  Never |
| --- | --- | --- | --- | --- | --- |
| How often do you consume finger millet-based Injera |  |  |  |  |  |
| How often do you consume finger millet-based Atimit |  |  |  |  |  |
| How often do you consume finger millet-based Bread |  |  |  |  |  |
| How often do you consume finger millet-based Beverage |  |  |  |  |  |
| How often do you consume finger millet-based porridge or *Genfo* |  |  |  |  |  |
| How often do you consume finger millet-based Kita |  |  |  |  |  |

**Part VI: Finger millet-based food processing**

1. Tools and equipment used in household finger millet-based food processing

1) Cooking pots 2) Grinding stones 3) Special cooking utensils for finger millet-based dishes 4) Fermentation vessels 4) All are used

1. Who primarily prepares or processes finger millet-based food products at household level

1) Women 2) Men

1. What are major challenges faced in preparing or processing of finger millet-based foods

1) Labour intensive 2) Time-consuming 3) Specific difficulties with certain processing techniques 4) Limited access to ingredients 5) Long preparation period
