# Supplementary material
Source: Research Square preprint supplement (doi:10.21203/rs.3.rs-9486129/v1)
Supplement: Supplementary file 2 [file ed88f724f3a3942656899d4a.docx]

**Table 5:** Frequency of Finger Millet Consumption by Their Level of Income

|  | | Income Level of the Respondent | | | | | |
| --- | --- | --- | --- | --- | --- | --- | --- |
| <25,000 | 25,000 - 50,000 | 50,000 - 75,000 | 75,000 - 100,000 | >100,000 | Total |
| Frequency of finger millet based Injera consumption | Daily | 79 (67%) | 37 (55%) | 28 (44%) | 20 (41%) | 12 (52%) | 176 (55%) |
| Weekly  Monthly | 6 (5%) | 7 (10%) | 8 (13%) | 2 (4%) | 5 (22%) | 28(9%) |
| 4(3%) | 1(1%) | 1(2%) | 4(8%) | 1(4%) | 11(3%) |
| Less than monthly | 9(8%) | 11(16%) | 15(24%) | 9(18%) | 3(13%) | 47(15%) |
| Never | 20(17%) | 11(16%) | 11(17%) | 14(29%) | 2(9%) | 58(18%) |
| Total | 118(100%) | 67(100%) | 63(100%) | 49(100%) | 23100% | 320(100%) |
| Frequency of finger millet based Atimit consumption? | Daily | 1(1%) | 3(4%) | 4(6%) | 2(4%) | -  - | 10(3%) |
| Weekly | 24(20%) | 12(18%) | 5(8%) | 8(16%) | 5(22%) | 54(17%) |
| Monthly | 30(25%) | 14(21%) | 16(25%) | 12(24%) | 3(13%) | 75(23%) |
| Less than monthly | 15(13%) | 17(25%) | 9(14%) | 8(16%) | 3(13%) | 52(16%) |
| Never | 48(41%) | 21(31%) | 29(46%) | 19(39%) | 12(52%) | 129(40%) |
| Total | 118(100%) | 67(100%) | 63(100%) | 49(100%) | 23(100%) | 320  (100%) |
| Frequency of finger millet based Bread consumption? | Daily | 1(1%) | 2(3%) | - | - | - | 3(1%) |
| Weekly | 15(13%) | 8(12%) | 6(10%) | 4 (8%) | 3(13%) | 36(11%) |
| Monthly | 32(13%) | 13(19%) | 10(16%) | 11(22%) | 7(30%) | 73(23%) |
| Less than monthly | 12(10%) | 11(16%) | 16(25%) | 4(8%) | 5(22%) | 48(15%) |
| Never | 58(49%) | 33(49%) | 31(49%) | 30(61%) | 8(35%) | 160(50%) |
| Total | 118(100%) | 67(100%) | 63(100%) | 49(100%) | 23(100%) | 320(100%) |
| Frequency of finger millet based Beverage consumption? | Daily | 24(20%) | 12(18%) | 10(16%) | 12(24%) | 3(13%) | 61(19%) |
| Weekly | 39(33%) | 19(28%) | 17(27%) | 11(22%) | 5(22%) | 91(28%) |
| Monthly | 27(23%) | 13(19%) | 11(17%) | 13(27%) | 7(30%) | 71(22%) |
| Less than monthly | 14(12%) | 9(13%) | 19(30%) | 8(16%) | 8(35%) | 58(18%) |
| Never | 14(12%) | 14(21%) | 6(10%) | 5(10%) | - | 39(12%) |
| Total | 118(100%) | 67(100%) | 63(100%) | 49(100%) | 23(100%) | 320(100%) |
| Frequency of finger millet Porridge or Genfo consumption? | Daily | 2(2%) | - | - | - | - | 2(1%) |
| Weekly | 14(12%) | 5(7%) | 5(8%) | 5(10%) | 1(4%) | 30(9%) |
| Monthly | 21(18%) | 8(12%) | 5(8%) | 4(8%) | 4(17%) | 42(13%) |
| Less than monthly | 9(8%) | 6(9%) | 8(13%) | 5(10%) | 1(4%) | 29(9%) |
| Never | 72(61%) | 48(72%) | 45(71%) | 35(71%) | 17(74%) | 217(68%) |
| Total | 118(100%) | 67(100%) | 63(100%) | 49(100%) | 23(100%) | 320(100%) |
| Frequency of finger millet based Kita consumption? | Daily | 2(2%) | 2(3%) | 2(3%) | - | - | 6(2%) |
| Weekly | 14(12%) | 11(16%) | 4(6%) | 4(8%) | 2(9%) | 35(11%) |
| Monthly | 29(25%) | 8(12%) | 14(22%) | 7(14%) | 4(17%) | 62(19%) |
| Less than monthly | 20(17%) | 18(27%) | 23(37%) | 10(20%) | 6(26%) | 77(24%) |
| Never | 53(45%) | 28(42%) | 20(32%) | 28(57%) | 11(48%) | 140(44%) |
| Total | 118(100%) | 67(100%) | 63(100%) | 49(100%) | 23(100%) | 320(100%) |

**Table 6:** Factors Associated with Consumption of Finger Millet-Based Foods using Five Point Likert Scale

|  | **Factors Enforce Respondents to Consume Finger Millet Based Food** | | | | | | | |  | **Barriers that Prevent Respondents from Consuming Finger Millet Based Food** | | | | | | | | |
| --- | --- | --- | --- | --- | --- | --- | --- | --- | --- | --- | --- | --- | --- | --- | --- | --- | --- | --- |
| **Strongly Disagree** | **Disagree** | **Neutral** | **Agree** | **Strongly Agree** | **Weighted Score** | **Average Score/Mean** | **Standard Deviation** |  | **Strongly Disagree** | **Disagree** | **Neutral** | **Agree** | **Strongly Agree** | **Weighted Score** | **Average Score/Mean** | **Standard Deviation** |
| For weight loss | 36  (11%) | 134  (42%) | 47  (15%) | 94  (29%) | 9  (3%) | 866 | 2.71 | 1.09 |  | Lack of awareness | 28  (9%) | 70  (22%) | 7  (2%) | 155  (48%) | 60  (19%) | 1109 | 3.47 | 1.26 |
| To maintain blood sugar level | 25  (8%) | 52  (16%) | 75  (23%) | 151  (47%) | 17  (5%) | 1043 | 3.26 | 1.05 |  | Expensiveness | 71  (22%) | 216  (68%) | 8  (3%) | 20  (6%) | 5  (2%) | 632 | 1.98 | 0.80 |
| To boost immunity | 14  (4%) | 41  (13%) | 35  (11%) | 198  (62%) | 32  (10%) | 1153 | 3.60 | 0.98 |  | Lack of accessibility | 64  (20%) | 210  (66%) | 4  (1%) | 29  (9%) | 13  (4%) | 677 | 2.12 | 0.96 |
| To avoid cardiovascular risks | 18  (6%) | 32  (10%) | 36  (11%) | 201  (63%) | 33  10% | 1159 | 3.62 | 0.99 |  | Do not like its taste | 45  (14%) | 185  (58%) | 21  (7%) | 58  (18%) | 11  (3%) | 765 | 2.39 | 1.04 |
| For gluten free consumption | 21  (7%) | 55  (17%) | 45  (14%) | 180  (56%) | 19  (6%) | 1081 | 3.38 | 1.05 |  | Don’t know its processing recipes | 36  (11%) | 92  (29%) | 22  (7%) | 143  (45%) | 27  (8%) | 993 | 3.10 | 1.23 |
| Enhancing digestion | 24  (8%) | 101  (32%) | 42  (13%) | 132  (41%) | 21  (7%) | 985 | 3.08 | 1.14 |  | Considered it as rural food | 44  (14%) | 68  (21%) | 8  (3%) | 159  (50%) | 41  (13%) | 1045 | 3.27 | 1.31 |
| For blood pressure | 19  (6%) | 57  (18%) | 55  (17%) | 169  (53%) | 20  (6%) | 1074 | 3.36 | 1.03 |  | Its color | 47  (15%) | 101  (32%) | 12  (4%) | 141  (44%) | 19  (6%) | 944 | 2.95 | 1.26 |
| Alternate for maize, wheat and teff | 11  (3%) | 45  (14%) | 16  (5%) | 207  (65%) | 41  (13%) | 1182 | 3.70 | 0.98 |  | Cultural or family tradition | 29  (9%) | 61  (19%) | 16  (5%) | 180  (56%) | 34  (11%) | 1089 | 3.40 | 1.18 |
| To enrich haemoglobin | 8  (3%) | 40  (13%) | 69  (22%) | 187  (58%) | 16  (5%) | 1123 | 3.51 | 0.87 |  | Affordability | 55  (17%) | 236  (74%) | 4  (1%) | 21  (7%) | 4  (1%) | 643 | 2.01 | 0.75 |
| For nutritional Benefit | 8  (3%) | 31  (10%) | 26  (8%) | 226  (71%) | 29  (9%) | 1197 | 3.74 | 0.86 |  | Availability | 49  (15%) | 246  (77%) | 5  (2%) | 18  (6%) | 2  (1%) | 638 | 1.99 | 0.67 |
| To maintain overall health | 11  (3%) | 49  (15%) | 47  (15%) | 191  (60%) | 22  (7%) | 1124 | 3.51 | 0.95 |  |  | Composite Means of Barriers of consumption (Br_Comp_Mean) | | | | | 8537 | 2.67 | 0.53 |
|  | Composite Mean of Reason of Consumption | | | | | 11987 | 3.41 | 0.61 |  |  |  |  |  |  |  |  |  |

***Note:*** As indicated from Table 6, a *five-point likert scale (1=Strongly Disagree, 2=Disagree, 3=Neutral, 4=Agree, 5=Strongly Agree). Overall, the mean and standard deviation of 3.41 and 0.61, respectively, indicated that respondents perceived a positive (agreed) attitude towards finger millet-based food consumption. While on the right side of the table, with an overall mean of 2.67 and standard deviation of 0.53, indicated that attitudes of the respondents were neutral regarding factors that limit finger millet-based food consumption.*
